# Supplementary material
Source: MDPI journal article supplement (https://www.mdpi.com/2071-1050/9/9/1502)
Supplement: s1 [file s1]

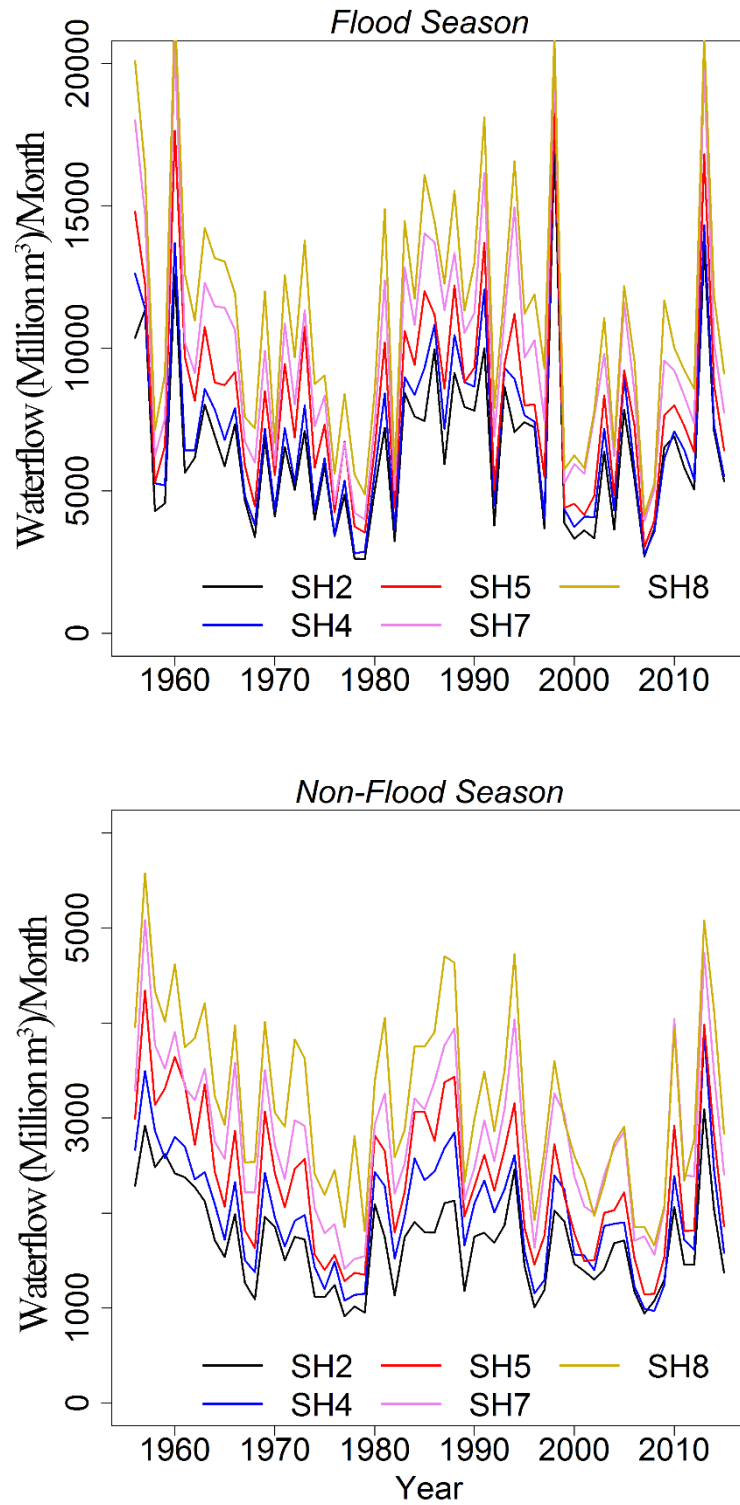

**Figure S1.** Monthly average of water flow in flood season and non-flood season in five hydrological stations of Songhua river from 1956 to 2015.

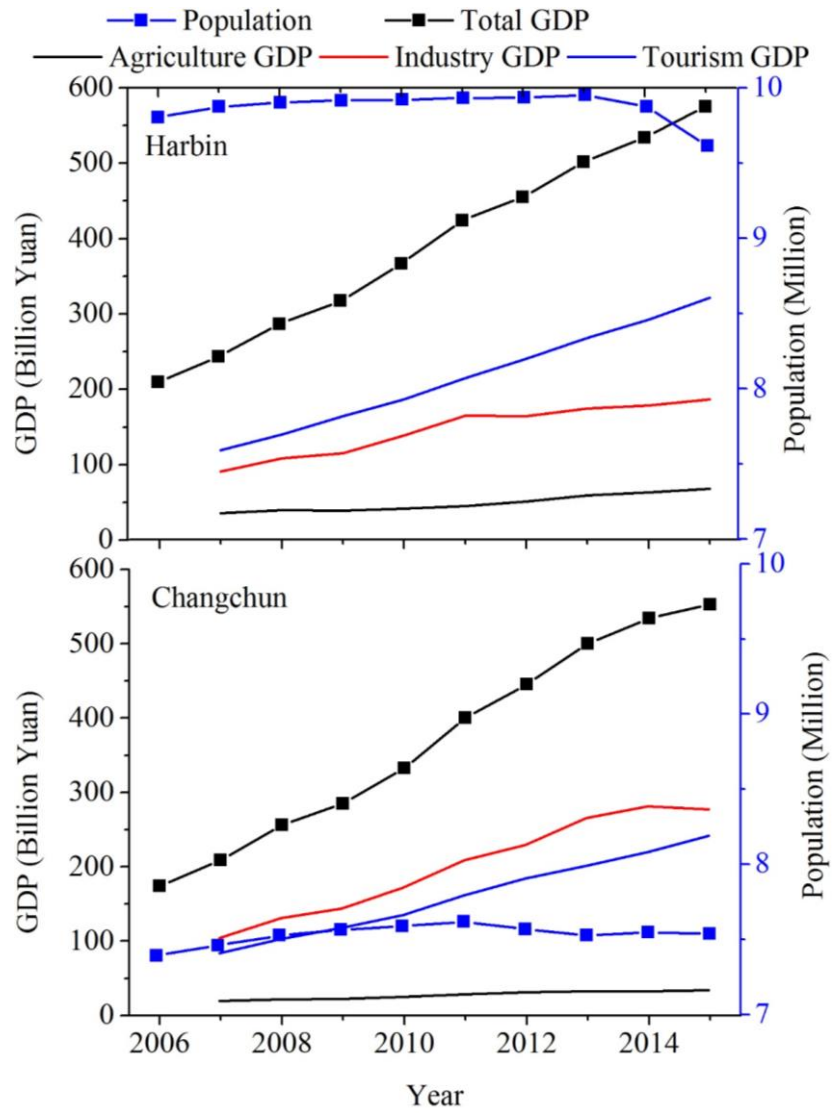

**Figure S2.** Population, gross domestic product (GDP) of agriculture, industry, tourism and total GDP in Harbin and Changchun which are two major cities along the Songhua river.
